# Supplementary material
Source: Springer Nature journal article supplement (https://www.springermedizin.de/resource/supplementary/12889_2010_3172_MOESM3_ESM.pdf/9488278)

### Base case

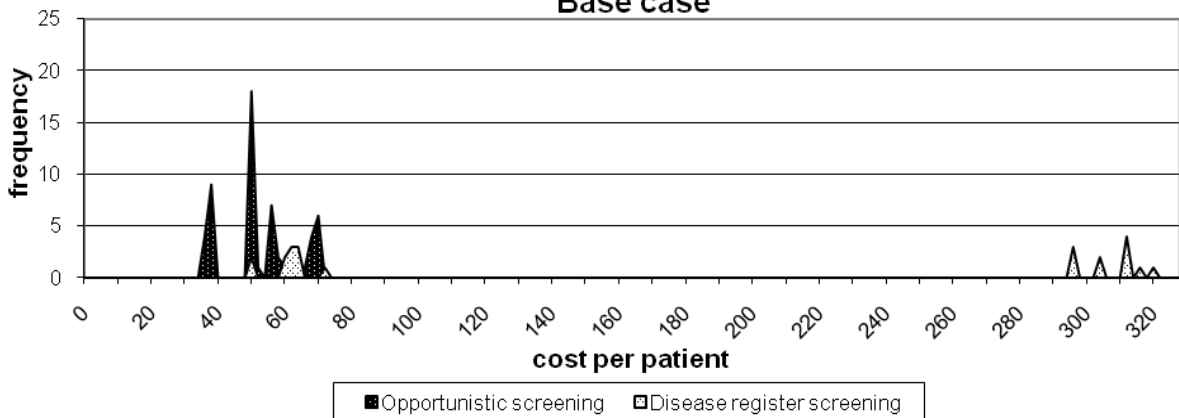

### Scenario 4

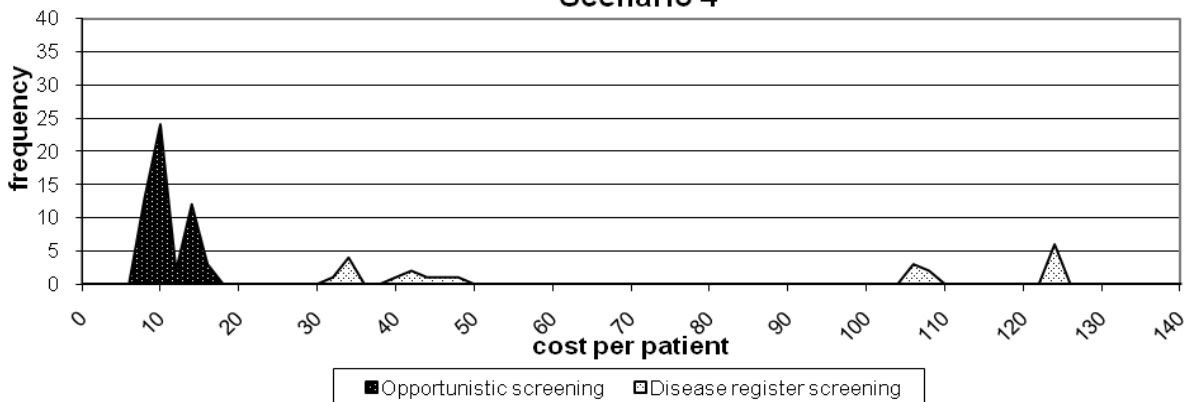

### Scenario 5

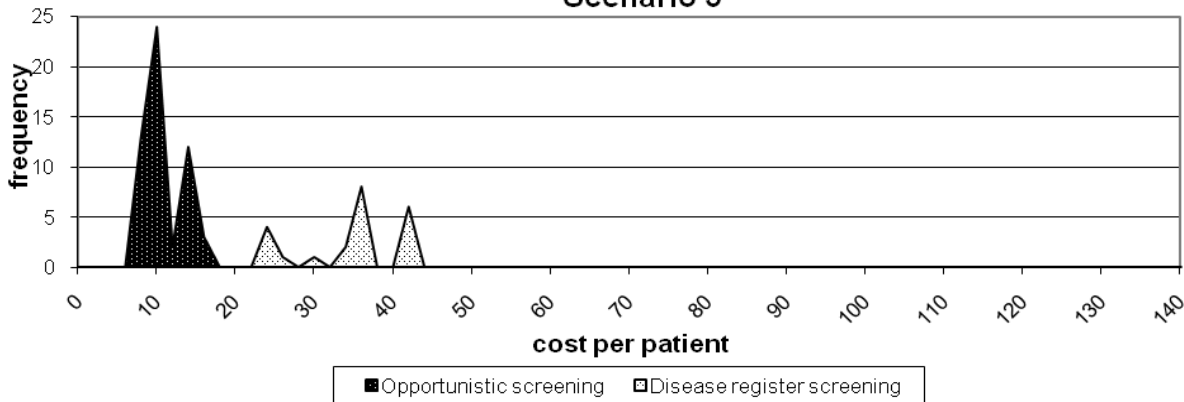

Supplement: MOESM3 [file 9488278]
